# Supplementary material for: Introduction to teaching science with three-dimensional images of dinosaur footprints from Cristo Rey, New Mexico
Source: Copernicus journal article supplement (doi:10.5194/gc-5-1-2022), 2022-01-04
Supplement: Supplementary file 1 [file gc-5-1-2022-supplement.zip]

Read me:

The pdf file that I attached should open with almost any Adobe Acrobat Pro software. Some versions of the software may require that 3-D be activated first and they should tell you that. It may take a few minutes for the file to open completely but when opened, you should be able to move it by running the mouse over it.
