# Supplementary material for: Introduction to teaching science with three-dimensional images of dinosaur footprints from Cristo Rey, New Mexico
Source: Copernicus journal article supplement (doi:10.5194/gc-5-1-2022), 2022-01-04
Supplement: Supplementary file 2 [file gc-5-1-2022-supplement.zip]

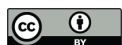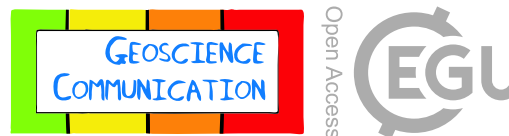

## *Supplement of*

# **Introduction to teaching science with three-dimensional images of dinosaur footprints from Cristo Rey, New Mexico**

**Valeria V. Martinez and Laura F. Serpa**

*Correspondence to:* Valeria V. Martinez (vvguerrero@miners.utep.edu)

- gc-5-1-2022-supplement-title-page.pdf
- gc-2021-15-Read me.pdf
- v\_4-4\_4-6\_simplified\_3d\_mesh.pdf

The copyright of individual parts of the supplement might differ from the article licence.
