# Supplementary material for: Introduction to teaching science with three-dimensional images of dinosaur footprints from Cristo Rey, New Mexico
Source: Copernicus journal article supplement (doi:10.5194/gc-5-1-2022), 2022-01-04
Supplement: Supplementary file 4 [file gc-5-1-2022-supplement.zip]

Archive with 3 entries (3 files):
- v_4-4_4-6_simplified_3d_mesh.pdf
- gc-2021-15-Read me.pdf
- gc-5-1-2022-supplement-title-page.pdf
