# Supplementary figures and images for: Introduction to teaching science with three-dimensional images of dinosaur footprints from Cristo Rey, New Mexico
Source: Copernicus journal article supplement (doi:10.5194/gc-5-1-2022), 2022-01-04

v\_4-4\_4-6\_simplified\_3d\_mesh

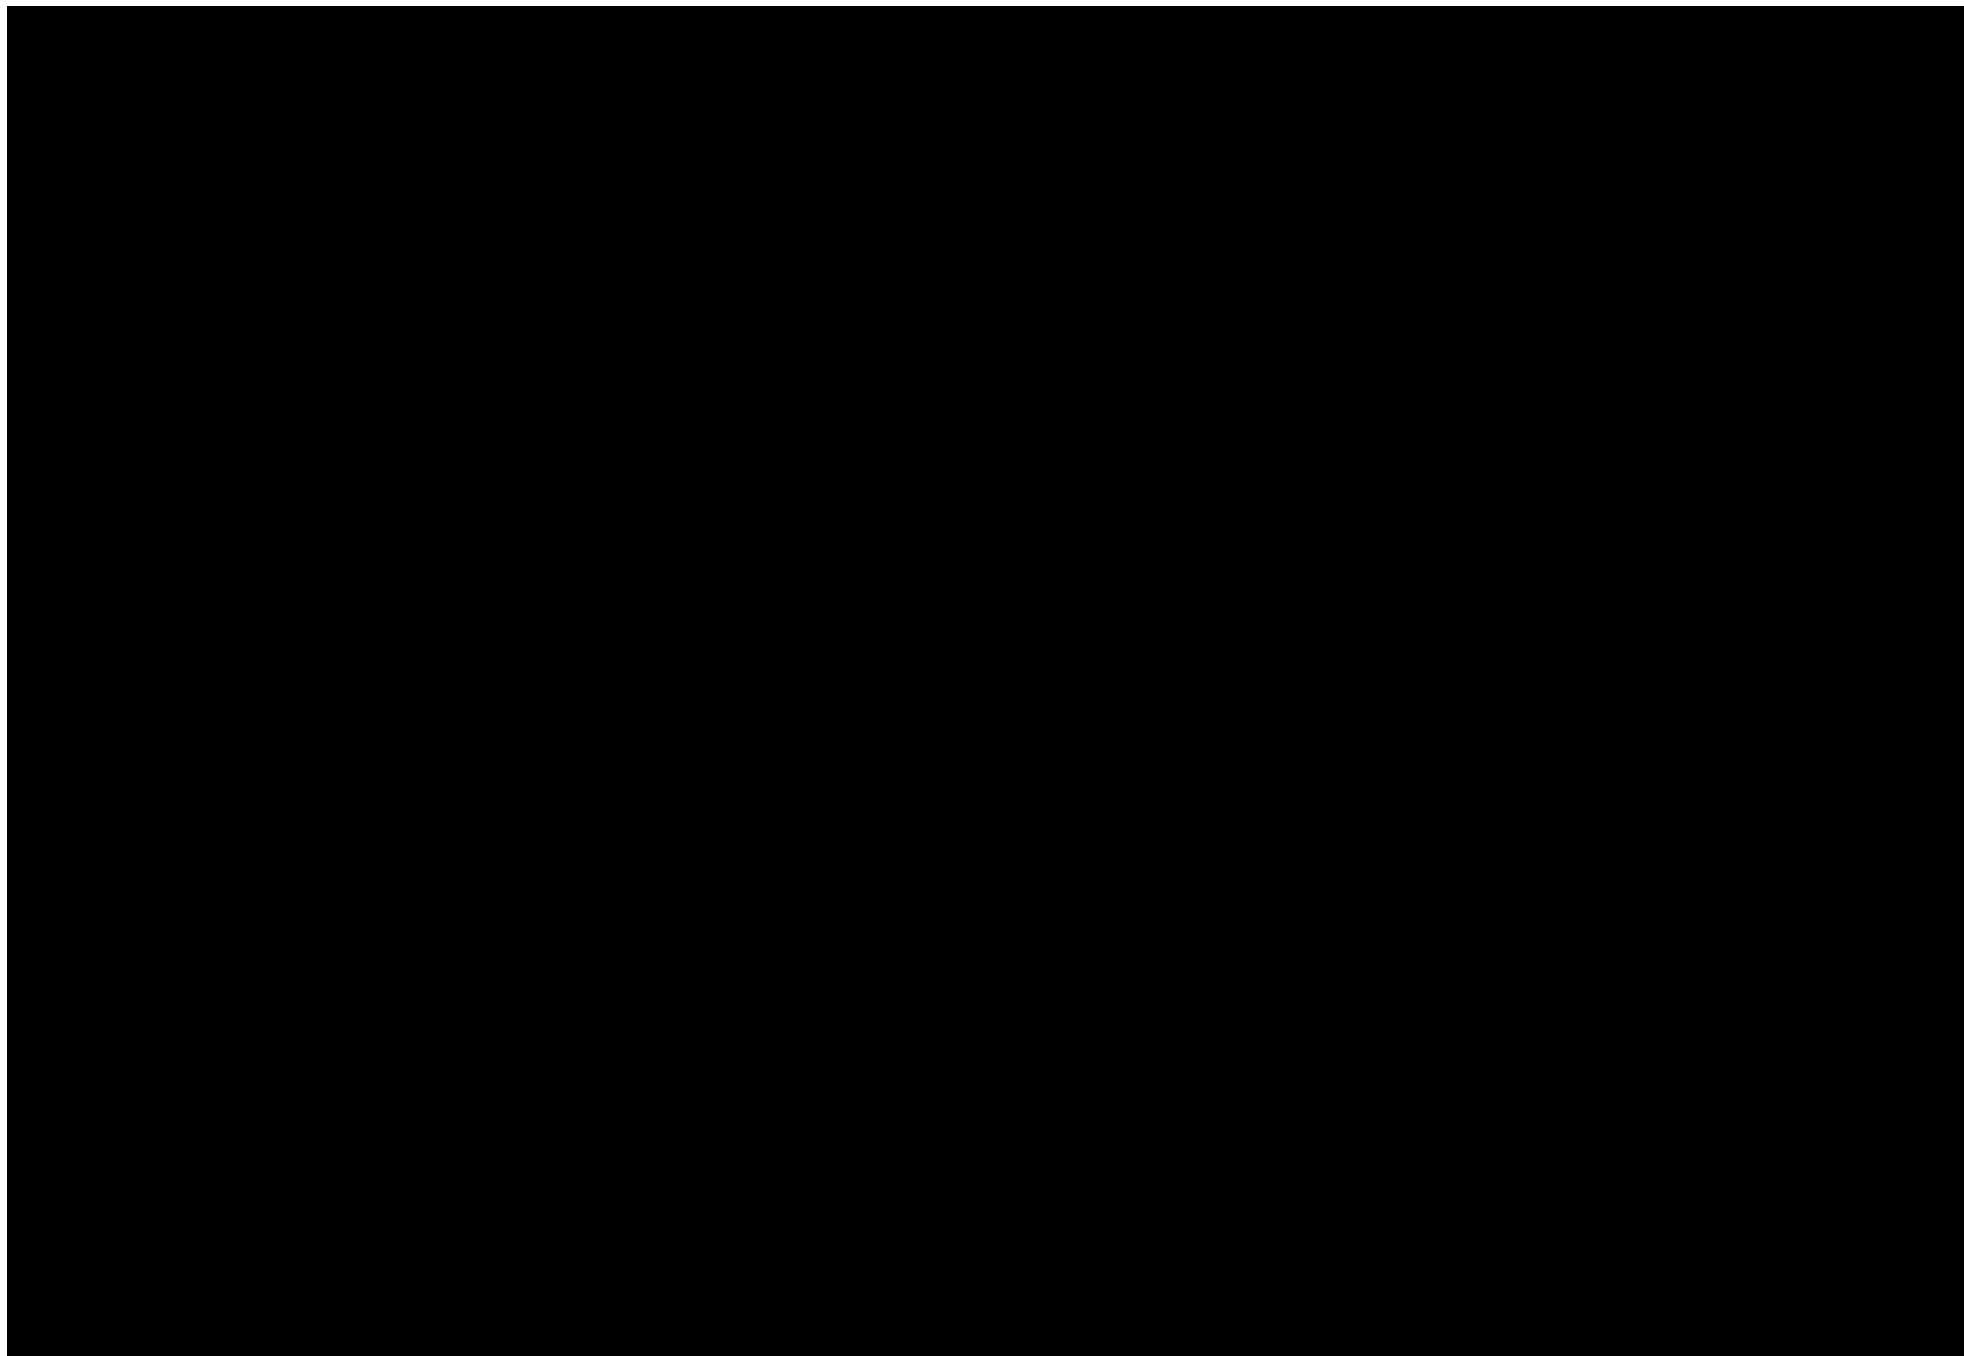

Supplement: Supplementary file 3 [file gc-5-1-2022-supplement.zip]
